# Supplementary material for: Rapid development of a robust bioprocess for subunit rotavirus vaccine production in Escherichia coli with the Quality by Design approach
Source: Research Square preprint supplement (doi:10.21203/rs.3.rs-7125264/v1), 2025-07-29
Supplement: Supplementary file 1 [file b922c77a00d1329fd43d894c.docx]

Supplementary Table S1 Verification of the robust setpoint and design space vertexs of VP4 protein production

| No. | Term | Parameter | | | | Yield  (mg/L) | WCW  (g/L) | Predicted yield (mg/L) | | |
| --- | --- | --- | --- | --- | --- | --- | --- | --- | --- | --- |
| TOI  (OD600) | ITmp  (oC) | Con  (μM) | SOFA  (mL/h) | Prediction | Lower limit | Upper limit |
| 1 | Robust Setpoint | 11.2 | 22.5 | 30.6 | 3.11 | 685.0 | 176.9 | 669.2 | 591.8 | 746.6 |
| 2 | Vertex 1 | 7.5 | 21.7 | 27.5 | 2.98 | 697.5 | 168.7 | 661.0 | 594.1 | 727.8 |
| 3 | Vertex 2 | 7.5 | 21.7 | 27.5 | 3.50 | 742.5 | 183.6 | 691.7 | 611.1 | 772.4 |
| 4 | Vertex 3 | 7.5 | 21.7 | 35.0 | 2.98 | 692.5 | 169.0 | 669.1 | 593.2 | 745.1 |
| 5 | Vertex 4 | 7.5 | 21.7 | 35.0 | 3.50 | 675.5 | 177.1 | 709.6 | 615.7 | 803.4 |
| 6 | Vertex 5 | 7.5 | 23.0 | 27.5 | 2.98 | 620.5 | 163.6 | 679.1 | 596.2 | 761.9 |
| 7 | Vertex 6 | 7.5 | 23.0 | 27.5 | 3.50 | 658.0 | 178.2 | 725.5 | 622.9 | 828.1 |
| 8 | Vertex 7 | 7.5 | 23.0 | 35.0 | 2.98 | 625.5 | 159.7 | 681.1 | 588.1 | 774.1 |
| 9 | Vertex 8 | 7.5 | 23.0 | 35.0 | 3.50 | 676.0 | 182.5 | 737.1 | 621.8 | 852.5 |
| 10 | Vertex 9 | 13.0 | 21.7 | 27.5 | 2.98 | 668.0 | 172.7 | 625.5 | 567.3 | 683.6 |
| 11 | Vertex 10 | 13.0 | 21.7 | 27.5 | 3.50 | 672.0 | 189.0 | 656.3 | 582.6 | 729.9 |
| 12 | Vertex 11 | 13.0 | 21.7 | 35.0 | 2.98 | 598.5 | 167.5 | 633.7 | 565.2 | 702.1 |
| 13 | Vertex 12 | 13.0 | 21.7 | 35.0 | 3.50 | 703.5 | 172.7 | 674.1 | 586.2 | 762.0 |
| 14 | Vertex 13 | 13.0 | 23.0 | 27.5 | 2.98 | 699.5 | 170.6 | 643.6 | 567.6 | 719.6 |
| 15 | Vertex 14 | 13.0 | 23.0 | 27.5 | 3.50 | 727.0 | 172.8 | 690.0 | 592.8 | 787.2 |
| 16 | Vertex 15 | 13.0 | 23.0 | 35.0 | 2.98 | 650.5 | 153.8 | 645.7 | 558.6 | 732.6 |
| 17 | Vertex 16 | 13.0 | 23.0 | 35.0 | 3.50 | 663.0 | 165.4 | 701.7 | 591.1 | 812.2 |
